# Supplementary material for: Normal reference value of orthodromic and antidromic sensory nerve conduction velocity of median nerve with intact palmaris longus tendon in apparently healthy individuals
Source: publisher site journal article supplement (doi:10.1515/jbcpp-2020-0375), 2021-07-22

**Image-1. Test for the assessment of the PL tendon**


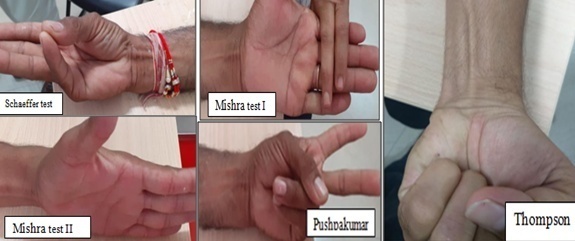


**Image –2. Placement of ring electrode (a) and surface electrode(b) for orthodromic and antidromic recording of median nerve sensory conduction**


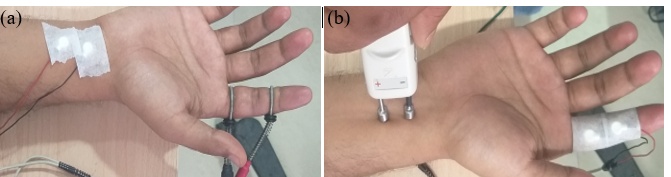


**Image-3. Sensory nerve action potentials recording of antidromic (a)(b) and orthodromic (c)(d) records for sensory median nerve fibers.**


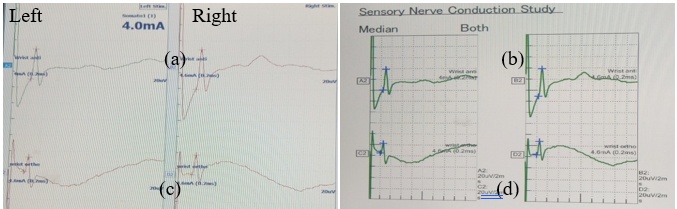

Supplement: Supplementary file 1 [file j_jbcpp-2020-0375_suppl_003.docx]
